# Supplementary material
Source: publisher figshare collection journal article supplement (https://gsajournals.figshare.com/ndownloader/files/27462719)
Supplement: Supplementary file 1 [file 27462719]

## Sheet: GD_vs_NGD_superkingdom_bacteria
superkingdom	levine_statistic	levine_pval	t_statistic	t_pval	t_padj	t_padj_reject	blast_sseqid	blast_evalue	length	SRR1060781	SRR1060791	SRR1060795	SRR1060785	SRR1060762	SRR1060756	SRR1060772	SRR1060776	SRR1060799	SRR1060789	SRR1060766	SRR1060771	SRR1060755	SRR1060761	SRR1060765	SRR1060775	SRR1060792	SRR1060759	SRR1060782	SRR1060769	SRR1060786	SRR1060796	SRR1060779	SRR1060757	SRR1060773	SRR1060763	SRR1060788	SRR1060767	SRR1060777	SRR1060798	SRR1060753	SRR1060790	SRR1060780	SRR1060784	SRR1060794	SRR1060783	SRR1060758	SRR1060793	SRR1060797	SRR1060778
Bacteria	3.85865	0.055684	-2.99873	0.00440477	0.00440477	TRUE	1.4643e+06	0.034604	8835845	368.159	340.89	258.102	265.93	3535.34	1167.12	2214.08	2806.45	267.74	211.352	838.784	961.775	725.502	1098.13	8404.37	933.204	244.682	872.519	168.065	578.275	276.74	259.372	337.451	579.568	1087.49	654.812	2135.59	801.423	237.383	281.996	8483.74	270.965	31.9666	278.534	240.56	259.201	740.428	369.234	239.064	310.569
[truncated: 7 more columns]

## Sheet: GD_vs_NGD_superkingdom_viruses
superkingdom	levine_statistic	levine_pval	t_statistic	t_pval	t_padj	t_padj_reject	blast_sseqid	blast_evalue	length	SRR1060781	SRR1060791	SRR1060795	SRR1060785	SRR1060762	SRR1060756	SRR1060772	SRR1060776	SRR1060799	SRR1060789	SRR1060766	SRR1060771	SRR1060755	SRR1060761	SRR1060765	SRR1060775	SRR1060792	SRR1060759	SRR1060782	SRR1060769	SRR1060786	SRR1060796	SRR1060779	SRR1060757	SRR1060773	SRR1060763	SRR1060788	SRR1060767	SRR1060777	SRR1060798	SRR1060753	SRR1060790	SRR1060780	SRR1060784	SRR1060794	SRR1060783	SRR1060758	SRR1060793	SRR1060797	SRR1060778
Viruses	3.57213	0.0652082	-2.23313	0.0305582	0.0305582	TRUE	30136.5	8.4e-25	72809	0.162547	0.0469734	0.228192	0.239722	25.0423	1.33428	4.45322	0.148176	0.302493	0.0236715	0.387559	0.963521	0.659055	0.511405	1.79022	1.17901	0.0739003	0.785478	0.139414	0.548699	0.22296	0.0867004	0.0970665	0.46638	0.564708	0.767825	0.0958698	0.484145	0.0754614	0.291593	2.04488	0.0764162	0.000415731	0.154646	0.140359	0.183526	0.813558	0.151945	0.195093	0.0720748
[truncated: 7 more columns]

## Sheet: GD_vs_NGD_sig_bacteria_species
species	levine_statistic	levine_pval	t_statistic	t_pval	t_padj	t_padj_reject	blast_sseqid	blast_evalue	length	SRR1060781	SRR1060791	SRR1060795	SRR1060785	SRR1060762	SRR1060756	SRR1060772	SRR1060776	SRR1060799	SRR1060789	SRR1060766	SRR1060771	SRR1060755	SRR1060761	SRR1060765	SRR1060775	SRR1060792	SRR1060759	SRR1060782	SRR1060769	SRR1060786	SRR1060796	SRR1060779	SRR1060757	SRR1060773	SRR1060763	SRR1060788	SRR1060767	SRR1060777	SRR1060798	SRR1060753	SRR1060790	SRR1060780	SRR1060784	SRR1060794	SRR1060783	SRR1060758	SRR1060793	SRR1060797	SRR1060778
Agromyces protaetiae	26.0935	6.41122e-06	-5.22962	4.26706e-06	0.000272665	TRUE	94.315	0	821	0	0.00288428	0.0052814	0.00701121	0	0.0503505	0.0963138	0.00365851	0.00738872	0.00228573	0.0163692	0.0636708	0.0192845	0.0377336	0.0673135	0.0532104	0.0126513	0.0765505	0.00385527	0.0123469	0.0119287	0.00608853	0.00343563	0.0161796	0.0260124	0.0146622	0.00598667	0.0297219	0.00620838	0.0238055	0.0249784	0.00629547	0	0.0329268	0.009555	0.00459473	0.0584904	0.0128507	0.00612645	0.00544763
Bacillus aryabhattai	6.40588	0.0149392	-6.23631	1.39104e-07	1.1111e-05	TRUE	288.435	2.43e-168	1257	0.0215162	0.0165219	0.0313958	0.0192178	0.297334	0.0999182	0.135952	0.0830033	0.0424659	0.00380022	0.0897766	0.154879	0.105134	0.0695291	0.188612	0.106208	0.0158197	0.121413	0.00699805	0.0551742	0.0623122	0.0476915	0.0334656	0.0517679	0.11048	0.0657939	0.0913013	0.0801857	0.00289031	0.0100567	0.244255	0.0113493	0	0.0111407	0.0335408	0.0287257	0.146956	0.0156988	0.023588	0
Bacillus cereus	12.2514	0.00106086	-8.65549	3.90938e-11	1.52038e-08	TRUE	1081.4	1.02e-62	7105	0.0194138	0.0921205	0.108728	0.0553802	1.14355	0.43635	0.428652	0.0830173	0.0892223	0.0471487	0.234797	0.530729	0.312334	0.397231	0.574706	0.47394	0.0455052	0.411944	0.0400751	0.220529	0.0801424	0.064996	0.0653862	0.260156	0.369582	0.286811	0.0901647	0.388525	0.0400329	0.092729	0.712619	0.0586719	0.00408352	0.0784348	0.0643507	0.0813022	0.311819	0.0473288	0.0905341	0.0849738
Bacillus megaterium	7.1383	0.0104686	-5.14399	5.68707e-06	0.000330367	TRUE	291.441	3.17e-95	1714	0.0280679	0.0365918	0.0119947	0.0116253	0.419412	0.071943	0.288527	0.00719524	0.00911932	0.00514603	0.0707991	0.110981	0.040267	0.124368	0.347197	0.0965821	0	0.0867319	0.00354169	0.0863173	0.0089855	0	0.00260131	0.0656848	0.064856	0.0707758	0.00719251	0.0589834	0.00139386	0.00976713	0.140506	0.0021876	0	0.0528062	0.0274329	0.0379706	0.144461	0.00302457	0.0252965	0.0343009
Bacillus polymachus	9.3111	0.00381268	-6.09979	2.21968e-07	1.57597e-05	TRUE	98.301	0	471	0.0570075	0.0270233	0.0647651	0.0949623	0.179531	0.158137	0.434544	0.203937	0.022246	0.0124753	0.13605	0.319683	0.13042	0.231484	0.403461	0.243268	0.0143661	0.337077	0.0220721	0.140754	0.0908034	0.0102532	0.0262003	0.12722	0.24681	0.250693	0.116273	0.205672	0.0405294	0.0732561	0.447839	0.0154997	0.00535423	0.049048	0.0416695	0.0291239	0.209469	0.0514223	0.0293673	0.0892214
Bacillus sp. BD59S	7.29609	0.00970698	-7.81876	6.33571e-10	1.01213e-07	TRUE	195.04	0	3133	0.0116778	0.012297	0.01788	0.00719115	0.0490517	0.083656	0.118866	0.0681095	0.0301079	0.0016521	0.0465089	0.143381	0.0848267	0.0751418	0.146901	0.0914761	0.00582656	0.139303	0.011502	0.0747693	0.0382819	0.0091621	0.00991526	0.0753284	0.0588014	0.0606723	0.0331707	0.0813837	0.0080823	0.0162216	0.112417	0.00557473	0.00468153	0.035536	0.0290033	0.0497775	0.0983343	0.0107876	0.00742098	0.0133303
Bacillus sp. T3-8	7.28992	0.00973565	-4.30055	9.04157e-05	0.00412683	TRUE	99.31	1.4e-66	145	0	0	0	0	0	0.105945	0.500861	0.0170004	0.0283513	0	0.0268926	0.143237	0.0823663	0.0508197	0.122105	0.1941	0	0.0757861	0.0195706	0.0848801	0	0.0341815	0	0.0916101	0.0569317	0.0539355	0	0.0870057	0	0.0297445	0.0691197	0.011928	0	0	0.0239098	0	0.0793445	0.0224458	0.0687987	0
Bacillus sp. mixed culture X1-1F	8.62559	0.00520885	-6.37032	8.79052e-08	8.02449e-06	TRUE	97.685	0	720	0.0070363	0.00452222	0.0131539	0.0183663	0.149014	0.0631679	0.0682404	0.0176363	0.0344667	0.0161937	0.0179159	0.0628702	0.040515	0.0544449	0.150528	0.0548201	0	0.0419544	0.0101943	0.0375175	0.00478873	0.00670728	0.0158102	0.0439088	0.039992	0.0708161	0.0146237	0.069561	0	0.00652987	0.145838	0.0170387	0	0.0293273	0.00885502	0	0.0590123	0.0132596	0.00634549	0.00633858
Bacillus thuringiensis	9.53664	0.00344493	-6.93649	1.26585e-08	1.61775e-06	TRUE	381.42	3.18e-63	3477	0.0152607	0.0335218	0.0256132	0.0330198	0.679036	0.210365	0.263088	0.116536	0.0603693	0.0118013	0.12691	0.364625	0.154833	0.164287	0.388497	0.228944	0.0134079	0.195034	0.0155062	0.120132	0.0343491	0.0120117	0.0349011	0.128829	0.134295	0.136191	0.0729573	0.189856	0.0223172	0.0136013	0.32398	0.0253045	0	0.0118005	0.039705	0.0243938	0.155465	0.00668029	0.0363434	0.0356908
Cedecea neteri	4.84538	0.032891	-3.58179	0.00083339	0.0313257	TRUE	92.354	0	1812	0.018341	0.0188156	0.0163519	0.0184378	0.647808	0.102994	0.121087	0.016885	0.0303511	0.00467738	0.0391588	0.0804823	0.0583752	0.0911273	0.148274	0.0669933	0.00619599	0.0821208	0.021112	0.0283255	0.015769	0.0248513	0.0218904	0.0392138	0.0616042	0.0455299	0.0148192	0.0560655	0.00991938	0.00838437	0.1333	0.01212	0	0.00478655	0.0111718	0.0183958	0.0630059	0.0136508	0.0235946	0.0122104
Cellulosimicrobium cellulans	36.4358	2.75883e-07	-4.65968	2.83019e-05	0.00150708	TRUE	178.182	3.3e-39	728	0.0055148	0	0	0.00889809	0	0.0578029	0.0422096	0.00500669	0	0.00283798	0.00725876	0.0350619	0.0174332	0.0296885	0.0359965	0.0166544	0.0261612	0.0728136	0.0139954	0.00776662	0	0.0103169	0	0.00361803	0.0272387	0.0136512	0	0	0	0	0	0.00946192	0	0.00717859	0	0	0.0405536	0	0	0.00818449
Chryseobacterium gallinarum	13.6803	0.000587299	-8.59577	4.75861e-11	1.52038e-08	TRUE	563.726	0	9616	0.00855186	0.012392	0.0171037	0.0164142	0.125599	0.0731831	0.159169	0.0703583	0.0102231	0.00714734	0.0374803	0.105919	0.0764576	0.0734025	0.114691	0.0706148	0.00410509	0.0899205	0.00935061	0.0520575	0.010984	0.00310302	0.0143806	0.0345839	0.0574964	0.0586585	0.0345071	0.08409	0.0067529	0.0200441	0.1156	0.0234231	0	0.0146781	0.00623269	0.00956268	0.0710965	0.00566134	0.00716154	0.0244937
Cupriavidus metallidurans	18.2646	9.84962e-05	-4.32862	8.26569e-05	0.00406291	TRUE	1598.18	1.41168e-66	2639	0	0	0	0.0305005	0	0.0344354	0.122281	0	0	0	0.0626622	0.082685	0.0247132	0.0170967	0.0522775	0.0642636	0	0.0300737	0	0.055343	0	0	0	0.017052	0.0375766	0.108617	0	0.0458824	0.0121533	0	0.168118	0	0	0	0.0193913	0	0.0294244	0	0	0
Escherichia coli	6.10713	0.0173149	-3.5219	0.000995143	0.0353276	TRUE	11996.2	1.303e-33	36409	0.526207	0.52372	0.309669	0.385156	16.4008	2.89547	6.12969	3.51216	0.446679	0.319891	1.85345	2.01509	1.8558	2.14847	16.6891	2.42413	0.371516	1.90317	0.243797	1.49933	0.442197	0.457157	0.554039	1.40528	2.06045	1.46131	2.55665	1.80017	0.280149	0.51837	17.3437	0.38041	0.0533375	0.54912	0.366387	0.454212	1.82604	0.451067	0.336785	0.401006
Gammaproteobacteria bacterium ESL0073	6.31291	0.0156388	-4.08392	0.000179479	0.0076458	TRUE	92.463	0	2512	0.0129779	0.0305834	0.021728	0.0345735	0.61352	0.146808	0.196755	0.0210281	0.0326306	0.0128284	0.0623978	0.137455	0.0864464	0.0804807	0.163444	0.0923951	0.0204512	0.120461	0.0217028	0.051415	0.0418632	0.0233394	0.0266882	0.0647865	0.0780852	0.0537657	0.0153838	0.0809126	0.0077454	0.0243929	0.160298	0.00572433	0.0018268	0.0325427	0.0296029	0.0289009	0.0709021	0.0192834	0.0303017	0.0165183
Microbacterium sediminis	11.2078	0.00165351	-3.40651	0.00139517	0.0469219	TRUE	479.691	1.3e-98	2081	0	0	0	0.0145471	0	0.00904739	0	0.0930873	0	0.0100416	0.0068184	0.325541	0.00888369	0.102176	0.0301375	0.0412013	0	0.370102	0	0.00373144	0	0	0.00457494	0.0101689	0.0933479	0.0421204	0.0308353	0.0100843	0.00321233	0	0.0672167	0.0102336	0.0040861	0	0.0353535	0.00666499	0.146448	0	0	0.00758103
uncultured Enterobacteriaceae bacterium	4.96713	0.0308726	-3.58393	0.000828107	0.0313257	TRUE	98.614	0	442	0.00527245	0.00785355	0	0	0.232453	0.0340184	0.224753	0	0.0130437	0.00511569	0.0327289	0.0313897	0.029651	0.0197905	0.0490019	0.0309226	0	0.0334898	0	0.0344649	0.0102902	0.00920074	0.0137318	0.0344897	0.0221825	0.00763261	0.00601911	0.0228555	0	0	0.0188377	0.00400404	0	0.0229237	0	0.0102415	0.0915352	0	0.0113797	0.0100775
uncultured Staphylococcus sp.	29.3761	2.24633e-06	-6.80233	2.00251e-08	2.13267e-06	TRUE	190.012	4.66e-145	1077	0.00384012	0	0	0.0126038	0	0.0644211	0.0924663	0.014895	0.00746073	0.00686669	0.0134617	0.0971543	0.0243428	0.0481011	0.0350246	0.0131467	0.0034167	0.0570871	0	0.0520201	0.00663192	0.00712903	0.00682371	0.0662082	0.0565037	0.0284725	0.00470365	0.0319851	0	0	0.0674448	0.00335653	0	0.00586235	0.0134849	0	0.0595404	0.00844968	0.012879	0.00276746
uncultured bacterium	25.5431	7.68306e-06	-8.19975	1.76815e-10	3.76617e-08	TRUE	3579.51	6.81e-34	14685	0.0563107	0.14212	0.172764	0.176229	1.84399	1.84619	0.947877	0.365465	0.301023	0.0637467	0.580336	1.72254	0.877603	0.599633	1.23433	1.0795	0.0425864	1.30793	0.101693	0.416275	0.166228	0.0844302	0.143014	0.236608	0.68999	0.690973	0.246929	1.03018	0.0421686	0.0785305	0.951441	0.140711	0.00309538	0.108588	0.231692	0.32351	0.735015	0.0790991	0.156035	0.0859078
[truncated: 7 more columns]

## Sheet: GD_vs_NGD_sig_bacteria_genus
genus	levine_statistic	levine_pval	t_statistic	t_pval	t_padj	t_padj_reject	blast_sseqid	blast_evalue	length	SRR1060781	SRR1060791	SRR1060795	SRR1060785	SRR1060762	SRR1060756	SRR1060772	SRR1060776	SRR1060799	SRR1060789	SRR1060766	SRR1060771	SRR1060755	SRR1060761	SRR1060765	SRR1060775	SRR1060792	SRR1060759	SRR1060782	SRR1060769	SRR1060786	SRR1060796	SRR1060779	SRR1060757	SRR1060773	SRR1060763	SRR1060788	SRR1060767	SRR1060777	SRR1060798	SRR1060753	SRR1060790	SRR1060780	SRR1060784	SRR1060794	SRR1060783	SRR1060758	SRR1060793	SRR1060797	SRR1060778
Cedecea	4.84538	0.032891	-3.58179	0.00083339	0.0379813	TRUE	92.354	0	1812	0.018341	0.0188156	0.0163519	0.0184378	0.647808	0.102994	0.121087	0.016885	0.0303511	0.00467738	0.0391588	0.0804823	0.0583752	0.0911273	0.148274	0.0669933	0.00619599	0.0821208	0.021112	0.0283255	0.015769	0.0248513	0.0218904	0.0392138	0.0616042	0.0455299	0.0148192	0.0560655	0.00991938	0.00838437	0.1333	0.01212	0	0.00478655	0.0111718	0.0183958	0.0630059	0.0136508	0.0235946	0.0122104
Cellulosimicrobium	36.4358	2.75883e-07	-4.65968	2.83019e-05	0.00216038	TRUE	178.182	3.3e-39	728	0.0055148	0	0	0.00889809	0	0.0578029	0.0422096	0.00500669	0	0.00283798	0.00725876	0.0350619	0.0174332	0.0296885	0.0359965	0.0166544	0.0261612	0.0728136	0.0139954	0.00776662	0	0.0103169	0	0.00361803	0.0272387	0.0136512	0	0	0	0	0	0.00946192	0	0.00717859	0	0	0.0405536	0	0	0.00818449
Chryseobacterium	17.3157	0.000140732	-7.46425	2.09879e-09	2.40312e-07	TRUE	1033.08	1e-10	10413	0.00855186	0.012392	0.0171037	0.0164142	0.125599	0.0968343	0.159169	0.0875649	0.0102231	0.00714734	0.0374803	0.105919	0.245564	0.0734025	0.114691	0.108558	0.00410509	0.0992277	0.00935061	0.0520575	0.010984	0.00310302	0.0143806	0.0345839	0.0708421	0.0586585	0.0438711	0.167214	0.0067529	0.0200441	0.153741	0.0234231	0	0.0146781	0.00623269	0.00956268	0.0710965	0.0187849	0.00716154	0.0315602
Escherichia	6.10713	0.0173149	-3.5219	0.000995143	0.0379813	TRUE	11996.2	1.303e-33	36409	0.526207	0.52372	0.309669	0.385156	16.4008	2.89547	6.12969	3.51216	0.446679	0.319891	1.85345	2.01509	1.8558	2.14847	16.6891	2.42413	0.371516	1.90317	0.243797	1.49933	0.442197	0.457157	0.554039	1.40528	2.06045	1.46131	2.55665	1.80017	0.280149	0.51837	17.3437	0.38041	0.0533375	0.54912	0.366387	0.454212	1.82604	0.451067	0.336785	0.401006
NA	20.5332	4.29988e-05	-8.02134	3.20927e-10	7.34924e-08	TRUE	5075.65	0.001227	20530	0.0745611	0.180556	0.194492	0.210803	2.68996	2.02702	1.40865	0.40393	0.346697	0.0816908	0.704639	2.0225	1.02148	0.733535	1.44678	1.21349	0.0630375	1.56804	0.190836	0.539974	0.244846	0.11697	0.183434	0.389578	0.84242	0.780748	0.268332	1.14177	0.049914	0.102923	1.13058	0.150439	0.00492218	0.164054	0.281018	0.362652	0.947643	0.106914	0.197717	0.140811
Sphingomonas	9.69737	0.00320585	-3.60376	0.000780643	0.0379813	TRUE	832.933	3.2e-09	1522	0	0	0	0	0	0.0231714	0.115413	0	0	0	0.0508669	0.0277606	0.0122814	0.0149905	0.121711	0	0	0.044489	0.0160057	0.0232212	0	0.0261467	0	0.0147863	0.0710566	0	0	0.0492422	0.011087	0	0.0920719	0	0	0	0	0.062218	0	0	0	0
[truncated: 7 more columns]

## Sheet: GD_vs_NGD_viruses_species
species	levine_statistic	levine_pval	t_statistic	t_pval	t_padj	t_padj_reject	blast_sseqid	blast_evalue	length	SRR1060781	SRR1060791	SRR1060795	SRR1060785	SRR1060762	SRR1060756	SRR1060772	SRR1060776	SRR1060799	SRR1060789	SRR1060766	SRR1060771	SRR1060755	SRR1060761	SRR1060765	SRR1060775	SRR1060792	SRR1060759	SRR1060782	SRR1060769	SRR1060786	SRR1060796	SRR1060779	SRR1060757	SRR1060773	SRR1060763	SRR1060788	SRR1060767	SRR1060777	SRR1060798	SRR1060753	SRR1060790	SRR1060780	SRR1060784	SRR1060794	SRR1060783	SRR1060758	SRR1060793	SRR1060797	SRR1060778
Arthrobacter phage Liebe	1.04449	0.312243	-1.022	0.312243	0.346602	FALSE	78.169	0	270	0	0	0	0	0	0	0	0	0	0	0	0	0	0	0	0	0	0	0	0	0	0	0	0	0	0	0	0	0	0	0	0	0	0	0	0	0	0	0	0
Bacillus phage vB_BhaS-171	2.18758	0.146094	-1.47905	0.146094	0.299672	FALSE	85.593	8.4e-25	170	0	0	0	0	0	0	0	0	0	0	0	0	0.013429	0	0	0	0	0	0	0	0	0	0	0	0	0	0	0.0139494	0	0	0	0	0	0	0	0	0	0	0	0
Enterobacteria phage GiZh	1.92902	0.171702	-1.38889	0.171702	0.299672	FALSE	100	3.43e-78	163	0	0	0	0	0	0	0	0	0	0	0	0	0.0168587	0.0179908	0	0	0	0	0	0	0	0	0	0	0	0	0	0	0	0	0.0491895	0	0	0	0	0.0244051	0	0	0	0
Enterobacteria phage Kha5h	0.109127	0.742673	0.330344	0.742673	0.742673	FALSE	100	6.62e-70	148	0	0	0	0	0	0	0	0	0	0	0	0	0	0	0	0	0	0	0	0	0	0	0	0.00967813	0	0	0	0	0	0	0	0.0165782	0	0	0	0	0	0	0	0
Enterobacteria phage T6	2.55774	0.116754	-1.59929	0.116754	0.299672	FALSE	300	1.15e-72	495	0	0	0	0	0.588939	0	0.103594	0	0	0	0	0	0.010449	0	0.0595774	0.0353431	0	0.0199572	0	0	0	0	0	0.00986137	0	0	0	0.029373	0	0	0.0634901	0	0	0	0	0	0	0	0	0
Escherichia phage D5505	1.07737	0.304832	-1.03796	0.304832	0.346602	FALSE	100	4.47e-61	132	0	0	0	0	0	0	0	0	0	0	0	0	0	0.0210767	0	0	0	0	0	0	0	0	0	0	0	0	0	0	0	0	0	0	0	0	0	0	0	0	0	0
Escherichia phage KIT03	1.16205	0.286786	-1.07798	0.286786	0.346602	FALSE	100	1.85e-91	187	0	0	0	0	0	0	0	0	0	0	0	0	0	0	0	0	0	0.0162341	0	0.0103973	0	0	0	0	0	0	0	0	0	0	0	0	0	0	0	0	0	0	0	0
Escherichia phage T2	1.75246	0.192254	-1.3238	0.192254	0.299672	FALSE	300	8e-85	677	0	0	0	0	0.836411	0	0	0	0	0	0	0.0356538	0.00663161	0	0.0535331	0.0150278	0	0.0108227	0	0	0	0	0	0.00646414	0	0	0	0	0	0	0.0700226	0	0	0	0	0	0	0	0	0
Escherichia phage vB_EcoM-G28	1.51872	0.224214	-1.23236	0.224214	0.306425	FALSE	100	2.38e-121	241	0	0	0	0	0.418779	0	0	0	0	0	0	0	0	0	0	0.020671	0	0	0	0	0	0	0	0	0	0	0	0	0	0	0.0348687	0	0	0	0	0	0	0	0	0
Escherichia phage vB_EcoM-Sa45lw	4.40543	0.041467	-2.09891	0.041467	0.283358	FALSE	200	1.02e-83	363	0	0	0	0	0	0	0	0	0	0	0.023693	0	0	0	0	0	0	0	0	0	0	0	0	0	0	0.0402994	0	0	0	0	0	0	0	0	0	0	0.0411602	0	0	0
Escherichia phage vB_EcoM_G10400	1.78747	0.187954	-1.33696	0.187954	0.299672	FALSE	100	6.14e-65	139	0	0	0	0	0	0	0.135867	0	0	0	0	0	0	0.0205562	0	0	0	0	0	0	0	0	0	0	0.023107	0	0	0	0	0	0	0	0	0	0	0	0	0	0	0
Escherichia phage vB_EcoM_G2133	0.957614	0.333021	-0.978578	0.333021	0.351912	FALSE	200	3.22e-73	421	0	0	0	0	0	0	0.129613	0.00837899	0	0	0	0	0	0	0	0.0183392	0	0	0	0	0	0	0	0	0.0225029	0	0	0	0	0	0	0	0	0.031318	0.0125446	0.0118164	0	0	0	0
Escherichia phage vB_EcoM_G2285	0.950732	0.334746	-0.975055	0.334746	0.351912	FALSE	100	2.12e-142	279	0.0103502	0	0.0179952	0	0	0	0	0	0	0	0	0	0	0	0	0	0	0	0	0	0	0	0	0.00727305	0	0	0	0	0	0	0	0	0	0	0	0	0	0	0	0
Escherichia phage vB_EcoM_G2540-3	1.7502	0.192535	-1.32295	0.192535	0.299672	FALSE	100	8.89e-95	193	0	0	0	0	0	0.0226728	0	0	0	0	0	0	0	0	0	0	0	0	0	0	0	0	0	0	0.0328458	0	0	0	0	0	0.0475353	0	0	0	0	0.0218554	0	0	0	0
Escherichia phage vB_EcoM_G4498	3.41644	0.0711275	-1.84836	0.0711275	0.299672	FALSE	200	7.09e-75	329	0	0	0	0	0	0	0	0	0	0	0	0	0	0.0207538	0	0.0344427	0	0	0	0.0116333	0	0	0	0	0	0	0	0.0168204	0	0	0	0.014475	0	0	0	0	0	0	0	0
Escherichia phage vB_EcoM_G50	2.10842	0.153427	-1.45204	0.153427	0.299672	FALSE	100	1.22e-77	162	0	0	0	0	0	0	0	0	0	0	0	0	0	0	0	0	0	0	0	0	0	0	0	0	0	0	0	0	0	0	0.0594869	0	0	0	0	0	0	0	0	0
Escherichia phage vB_EcoM_G8	1.43006	0.238017	-1.19585	0.238017	0.314797	FALSE	500	2.78e-63	948	0.0123818	0.0206076	0	0.0295392	0	0	0	0	0.0315355	0	0	0	0	0.0469953	0.0452843	0	0	0	0	0.00868329	0	0	0	0	0.0101974	0	0	0	0.00600598	0.0204426	0.0435587	0	0	0	0	0	0	0	0	0
Escherichia phage vB_EcoM_G9062	0.463186	0.499626	-0.680578	0.499626	0.512116	FALSE	200	1.46e-71	325	0.017615	0	0	0	0	0	0	0	0	0	0	0	0.029647	0	0	0.0329915	0	0	0	0	0.0276151	0	0	0	0.0179733	0	0	0	0	0	0	0	0	0	0	0	0	0	0	0
Escherichia phage vB_EcoM_R5505	2.18565	0.146268	-1.49945	0.14074	0.299672	FALSE	400	1.36e-66	730	0	0	0	0	0	0.0203253	0	0	0	0	0	0.0356089	0.0119392	0	0	0.0302849	0	0	0	0.00943835	0	0	0	0	0.0249998	0.0172784	0	0	0	0	0.0325754	0	0	0	0	0	0.0205416	0	0	0
Escherichia virus DE3	3.59053	0.0645455	-2.20358	0.0327138	0.283358	FALSE	399.942	9.61e-79	2703	0	0	0.00795729	0	0.44288	0.05552	0.153157	0.0102967	0.00309682	0	0.00585345	0.0200129	0.0125	0.0016505	0.0345594	0.0244294	0	0.0262479	0.0017968	0.0107403	0.00280013	0.00320922	0	0.0195722	0.0127549	0.0404621	0.00165549	0.0122676	0	0.00273981	0.0650907	0	0	0.00307039	0	0	0.00627584	0.0106607	0.00354178	0.00670057
Escherichia virus HY03	1.70387	0.198417	-1.30532	0.198417	0.299672	FALSE	200	6.62e-70	331	0	0	0	0	0.531632	0	0	0	0	0	0	0	0	0	0	0	0	0	0	0	0	0	0	0	0	0	0	0	0	0	0	0	0	0	0	0	0	0.0158582	0	0
Escherichia virus T4	3.34736	0.0739426	-2.16648	0.0356093	0.283358	FALSE	21395.4	2.68621e-59	49724	0.105893	0.00854592	0.133848	0.156379	20.5519	0.907117	2.64629	0.0919835	0.264678	0.022695	0.266559	0.696043	0.400213	0.322327	1.36112	0.834156	0.0518913	0.60317	0.136328	0.394138	0.140972	0.0825281	0.0789128	0.336089	0.348591	0.637348	0.0745096	0.320666	0.0446751	0.160945	1.2885	0.0362549	0	0.117571	0.112926	0.125449	0.685693	0.100838	0.133305	0.0645665
Escherichia virus VEc20	3.98408	0.0520053	-2.2394	0.0301175	0.283358	FALSE	1499.5	4.47035e-61	2429	0	0	0.0337247	0.0210762	0	0.114998	0.293564	0	0	0	0.0246341	0.0562736	0.054426	0.0159626	0.109952	0.0236008	0	0.0301766	0	0.0251403	0.0169574	0	0	0.0211444	0.0682222	0	0.0192394	0	0.0111641	0.0220636	0.0469274	0	0	0	0	0	0	0	0.0552709	0
Escherichia virus slur03	2.29732	0.136591	-1.51569	0.136591	0.299672	FALSE	400	1.09546e-67	621	0	0.0165022	0	0	0	0	0	0	0	0	0	0.0364326	0	0	0	0	0	0.0271682	0	0.0143823	0	0	0	0	0	0.0300835	0	0	0	0.0500285	0.0409076	0	0	0	0	0	0.0194119	0	0	0
Escherichia virus slur04	4.01874	0.0510362	-2.01291	0.0501297	0.293617	FALSE	699.296	6.456e-65	1217	0	0	0	0.0312242	0	0.0291767	0.424919	0.0162852	0	0	0	0.031184	0	0.0290588	0.0703208	0	0	0.0253399	0	0.00943835	0	0	0	0.0252259	0	0	0	0.061821	0	0	0	0	0	0	0	0	0.0172305	0	0	0
Geobacillus virus GBSV1	1.04449	0.312243	-1.022	0.312243	0.346602	FALSE	97.753	8.23e-80	178	0	0	0	0	0	0	0	0	0	0	0	0	0.0370513	0	0	0	0	0	0	0	0	0	0	0	0	0	0	0	0	0	0	0	0	0	0	0	0	0	0	0
Human endogenous retrovirus K	1.97184	0.167117	1.40422	0.167117	0.299672	FALSE	100	2.41e-34	144	0	0	0.0319603	0	0	0	0	0.0198516	0	0	0.0159575	0	0	0	0	0	0	0	0	0	0.0320946	0	0	0	0	0	0	0	0.0123544	0	0	0	0	0	0	0	0	0.023355	0	0
Human mastadenovirus C	2.79245	0.101651	-1.67106	0.101651	0.299672	FALSE	100	1.94e-70	154	0	0	0	0	0	0	0.149553	0	0	0	0.016956	0.0194746	0	0	0	0.0329017	0	0	0	0	0	0	0	0	0	0	0	0	0	0.030277	0	0	0	0	0	0	0	0	0	0
Macacine betaherpesvirus 3	3.3424	0.0741496	-1.82822	0.0741496	0.299672	FALSE	100	5.66e-60	130	0	0	0	0	0	0.0365251	0	0	0	0	0.0155334	0	0	0	0	0.0422512	0.0215492	0	0	0	0	0	0	0	0	0	0	0.0186063	0	0	0	0	0	0	0	0	0	0	0	0
Ralstonia phage 1 NP-2014	3.67893	0.0614631	-2.15754	0.03634	0.283358	FALSE	89.457	3.11e-103	5718	0.000584759	0.00131769	0.00270731	0.00150322	0.319935	0.0145565	0.0364922	0.00138026	0.00318265	0.000976498	0.00680131	0.0135487	0.00416998	0.0030859	0.0211187	0.00651563	0.000459777	0.0103814	0.00128842	0.00505756	0.002521	0.000963104	0.00107468	0.00583309	0.00351317	0.00235329	0.000465275	0.0106418	0.0012618	0.00509646	0.0222198	0.000903914	0.000415731	0.00268635	0	0	0.00742557	0.00123325	0.00297614	0.00080772
Salmonella phage SG1	1.04211	0.312788	-1.02084	0.312788	0.346602	FALSE	100	2.86e-84	174	0	0	0	0	0.527777	0	0	0	0	0	0	0	0	0	0	0	0	0	0	0	0	0	0.0170791	0	0	0	0	0	0	0	0	0	0	0	0	0	0	0	0	0
Shigella phage SHFML-11	3.15875	0.0822803	-1.77729	0.0822803	0.299672	FALSE	200	1.15e-72	430	0	0	0	0	0	0	0.117414	0	0	0	0	0	0.0223772	0	0.0347514	0	0	0	0	0	0	0	0	0	0	0	0	0	0	0	0.0539162	0.00820421	0	0	0	0	0	0	0	0
Shigella virus Pss1	2.48439	0.121986	-1.5762	0.121986	0.299672	FALSE	400	9.0757e-74	785	0	0	0	0	0	0.0625693	0.0517307	0	0	0	0	0	0	0.0119481	0	0	0	0	0	0	0	0	0	0.0102134	0	0	0	0	0	0	0.0334355	0	0	0	0	0	0	0	0	0
Shigella virus SHBML501	2.02245	0.161883	-1.42213	0.161883	0.299672	FALSE	100	3.18e-94	192	0	0	0	0	0	0	0.0895656	0	0	0	0	0	0	0	0	0	0	0	0	0	0	0	0	0	0	0	0	0	0	0	0	0	0	0	0	0	0	0	0	0
Shigella virus Sf22	4.9578	0.0310225	-2.22661	0.0310225	0.283358	FALSE	200	3.81e-67	300	0	0	0	0	0	0.0346913	0	0	0	0	0	0	0	0	0	0	0	0.0159803	0	0.0125405	0	0	0	0.0150248	0	0	0	0	0	0	0	0	0	0	0	0	0	0	0	0
Shigella virus Sf24	1.65653	0.204654	-1.28706	0.204654	0.299672	FALSE	100	3.52e-62	134	0	0	0	0	0	0.0361296	0.121458	0	0	0	0	0	0	0	0	0	0	0	0	0	0	0	0	0	0	0	0	0	0	0	0	0	0	0	0	0	0	0	0	0
Staphylococcus phage StB12	2.18422	0.146397	-1.47791	0.146397	0.299672	FALSE	94.675	1.69e-66	169	0	0	0	0	0	0	0	0	0	0	0	0	0.012758	0	0	0	0	0	0	0.0117281	0	0	0	0	0	0	0	0	0	0	0	0	0	0	0	0	0	0	0	0
Yersinia phage PYPS2T	2.54356	0.117745	-1.59486	0.117745	0.299672	FALSE	200	2.86e-84	397	0.0157225	0	0	0	0.37919	0	0	0	0	0	0	0	0.0266051	0	0	0	0	0	0	0	0	0	0	0	0	0	0	0	0	0	0.0359546	0	0	0	0.014888	0	0	0	0	0
Yersinia phage fPS-2	1.83975	0.181746	-1.35638	0.181746	0.299672	FALSE	100	1.02e-83	173	0	0	0	0	0	0	0	0	0	0	0.0115719	0	0	0	0	0.0280577	0	0	0	0	0	0	0	0	0	0	0	0	0	0	0	0	0	0	0	0	0	0	0	0
Yersinia phage fPS-90	1.52332	0.223525	-1.23423	0.223525	0.306425	FALSE	100	6.62e-91	186	0	0	0	0	0.444843	0	0	0	0	0	0	0.0192887	0	0	0	0	0	0	0	0	0	0	0	0	0	0	0	0	0	0	0.0571996	0	0	0	0	0	0.0158196	0	0	0
uncultured Caudovirales phage	1.04449	0.312243	-1.022	0.312243	0.346602	FALSE	96.622	1.44e-61	148	0	0	0	0	0	0	0	0	0	0	0	0	0	0	0	0	0	0	0	0.0253815	0	0	0	0	0	0	0	0	0	0	0	0	0	0	0	0	0	0	0	0
[truncated: 7 more columns]

## Sheet: GD_vs_NGD_viruses_genus
genus	levine_statistic	levine_pval	t_statistic	t_pval	t_padj	t_padj_reject	blast_sseqid	blast_evalue	length	SRR1060781	SRR1060791	SRR1060795	SRR1060785	SRR1060762	SRR1060756	SRR1060772	SRR1060776	SRR1060799	SRR1060789	SRR1060766	SRR1060771	SRR1060755	SRR1060761	SRR1060765	SRR1060775	SRR1060792	SRR1060759	SRR1060782	SRR1060769	SRR1060786	SRR1060796	SRR1060779	SRR1060757	SRR1060773	SRR1060763	SRR1060788	SRR1060767	SRR1060777	SRR1060798	SRR1060753	SRR1060790	SRR1060780	SRR1060784	SRR1060794	SRR1060783	SRR1060758	SRR1060793	SRR1060797	SRR1060778
Cytomegalovirus	3.3424	0.0741496	-1.82822	0.0741496	0.148299	FALSE	100	5.66e-60	130	0	0	0	0	0	0.0365251	0	0	0	0	0.0155334	0	0	0	0	0.0422512	0.0215492	0	0	0	0	0	0	0	0	0	0	0.0186063	0	0	0	0	0	0	0	0	0	0	0	0
Lambdavirus	3.59053	0.0645455	-2.20358	0.0327138	0.0872367	FALSE	399.942	9.61e-79	2703	0	0	0.00795729	0	0.44288	0.05552	0.153157	0.0102967	0.00309682	0	0.00585345	0.0200129	0.0125	0.0016505	0.0345594	0.0244294	0	0.0262479	0.0017968	0.0107403	0.00280013	0.00320922	0	0.0195722	0.0127549	0.0404621	0.00165549	0.0122676	0	0.00273981	0.0650907	0	0	0.00307039	0	0	0.00627584	0.0106607	0.00354178	0.00670057
Mastadenovirus	2.79245	0.101651	-1.67106	0.101651	0.162641	FALSE	100	1.94e-70	154	0	0	0	0	0	0	0.149553	0	0	0	0.016956	0.0194746	0	0	0	0.0329017	0	0	0	0	0	0	0	0	0	0	0	0	0	0.030277	0	0	0	0	0	0	0	0	0	0
Mosigvirus	0.950732	0.334746	-0.975055	0.334746	0.334746	FALSE	100	2.12e-142	279	0.0103502	0	0.0179952	0	0	0	0	0	0	0	0	0	0	0	0	0	0	0	0	0	0	0	0	0.00727305	0	0	0	0	0	0	0	0	0	0	0	0	0	0	0	0
NA	3.85471	0.0558043	-2.28452	0.0271091	0.0872367	FALSE	449.841	8.4e-25	6450	0.000584759	0.00131769	0.0346676	0.00150322	0.319935	0.0145565	0.0364922	0.0212319	0.00318265	0.000976498	0.0227588	0.0135487	0.017599	0.0030859	0.0211187	0.00651563	0.000459777	0.0103814	0.00128842	0.0304391	0.0346157	0.000963104	0.00107468	0.00583309	0.00351317	0.00235329	0.000465275	0.0245912	0.0136162	0.00509646	0.0222198	0.000903914	0.000415731	0.00268635	0	0	0.00742557	0.0245883	0.00297614	0.00080772
Phietavirus	2.18422	0.146397	-1.47791	0.146397	0.195197	FALSE	94.675	1.69e-66	169	0	0	0	0	0	0	0	0	0	0	0	0	0.012758	0	0	0	0	0	0	0.0117281	0	0	0	0	0	0	0	0	0	0	0	0	0	0	0	0	0	0	0	0
Svunavirus	1.04449	0.312243	-1.022	0.312243	0.334746	FALSE	97.753	8.23e-80	178	0	0	0	0	0	0	0	0	0	0	0	0	0.0370513	0	0	0	0	0	0	0	0	0	0	0	0	0	0	0	0	0	0	0	0	0	0	0	0	0	0	0
Tequatrovirus	3.54836	0.0660759	-2.21882	0.0315855	0.0872367	FALSE	28794.2	2.77943e-59	62746	0.151613	0.0456557	0.167572	0.238218	24.2795	1.22768	4.11402	0.116648	0.296214	0.022695	0.326458	0.910484	0.579147	0.506669	1.73454	1.07291	0.0518913	0.748849	0.136328	0.495792	0.185544	0.0825281	0.0959918	0.433701	0.54844	0.725009	0.093749	0.42868	0.0618452	0.253479	1.95757	0.0755123	0	0.148889	0.140359	0.183526	0.799857	0.116696	0.188576	0.0645665
[truncated: 7 more columns]
